# Supplementary material for: Superhard sp2–sp3 hybridized B2C3N2 with 2D metallicity
Source: Royal Society of Chemistry journal article supplement (doi:10.1039/d0cp03196h), 2020-01-01
Supplement: d0cp03196h1.pdf [file d0cp03196h1.pdf]

## Superhard $sp^2$ - $sp^3$ hybridized $B_2C_3N_2$ with 2D metallicity

Baozhong Li<sup>a</sup>, Yang Zhang<sup>a,b</sup>, Kun Luo<sup>a,b</sup>, Chenlong Xie<sup>a</sup>, Yufei Gao<sup>a,b</sup>, Lingjuan Hao<sup>a</sup>,  
Yingju Wu<sup>a</sup>, Shuangshuang Zhang<sup>a</sup>, Mengdong Ma<sup>a,c\*</sup>, Zhisheng Zhao<sup>a</sup> and Julong He<sup>a\*</sup>

<sup>a</sup>*Center for High Pressure Science (CHiPS), State Key Laboratory of Metastable  
Materials Science and Technology, Yanshan University, Qinhuangdao, 066004, China*

<sup>b</sup>*Key Laboratory of Microstructural Material Physics of Hebei Province, School of  
Science, Yanshan University, Qinhuangdao 066004, China*

<sup>c</sup>*School of Materials Science and Engineering, South China University of Technology,  
Guangzhou 510641, China*

\*Corresponding authors.

E-mail: mamengdong@scut.edu.cn; hjl@ysu.edu.cn

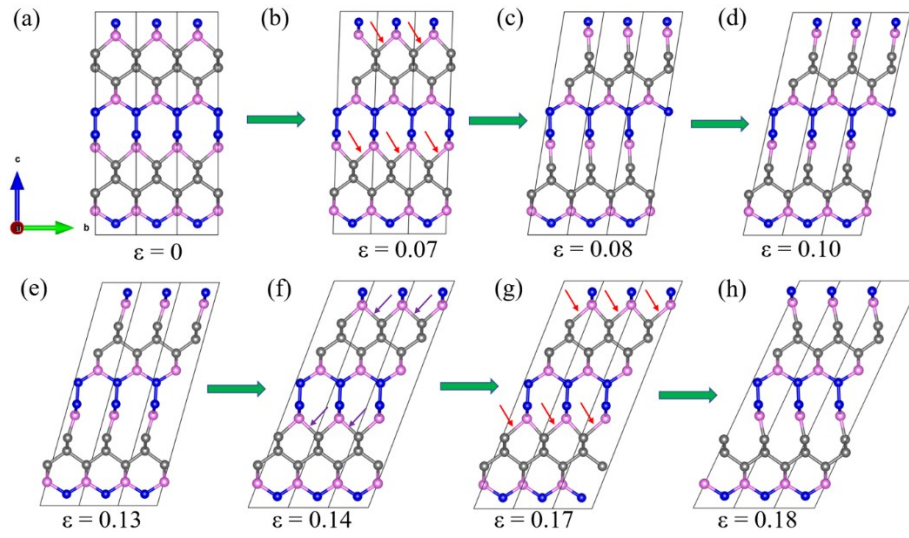

Figure S1. Structural snapshots of  $t\text{-B}_2\text{C}_3\text{N}_2$  under the  $\langle 011 \rangle$  tensile deformation.

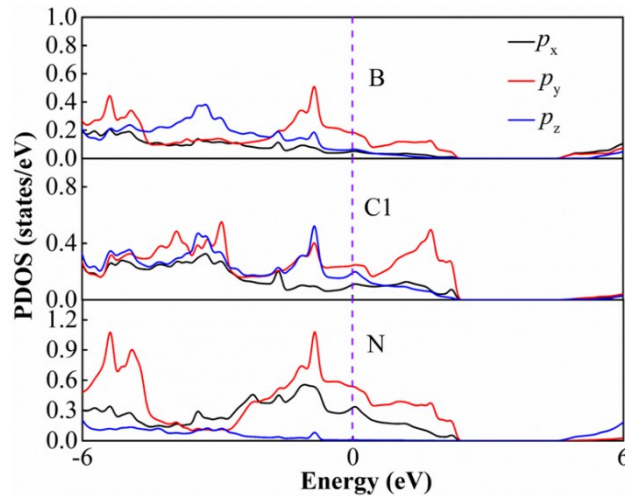

Figure S2. PDOS of  $p_x$ ,  $p_y$ , and  $p_z$  orbitals for B, C1, and N atoms.
